# Supplementary material for: Anti-FIRs (PUF60) auto-antibodies are detected in the sera of early-stage colon cancer patients
Source: PubMed Central journal article supplement (PMC5347708; doi:10.18632/oncotarget.12696), 2016-10-15
Supplement: oncotarget-07-82493-s001.pdf [file oncotarget-07-82493-s001.pdf]

## Anti-FIRs (PUF60) auto-antibodies are detected in the sera of early-stage colon cancer patients

### Supplementary Materials

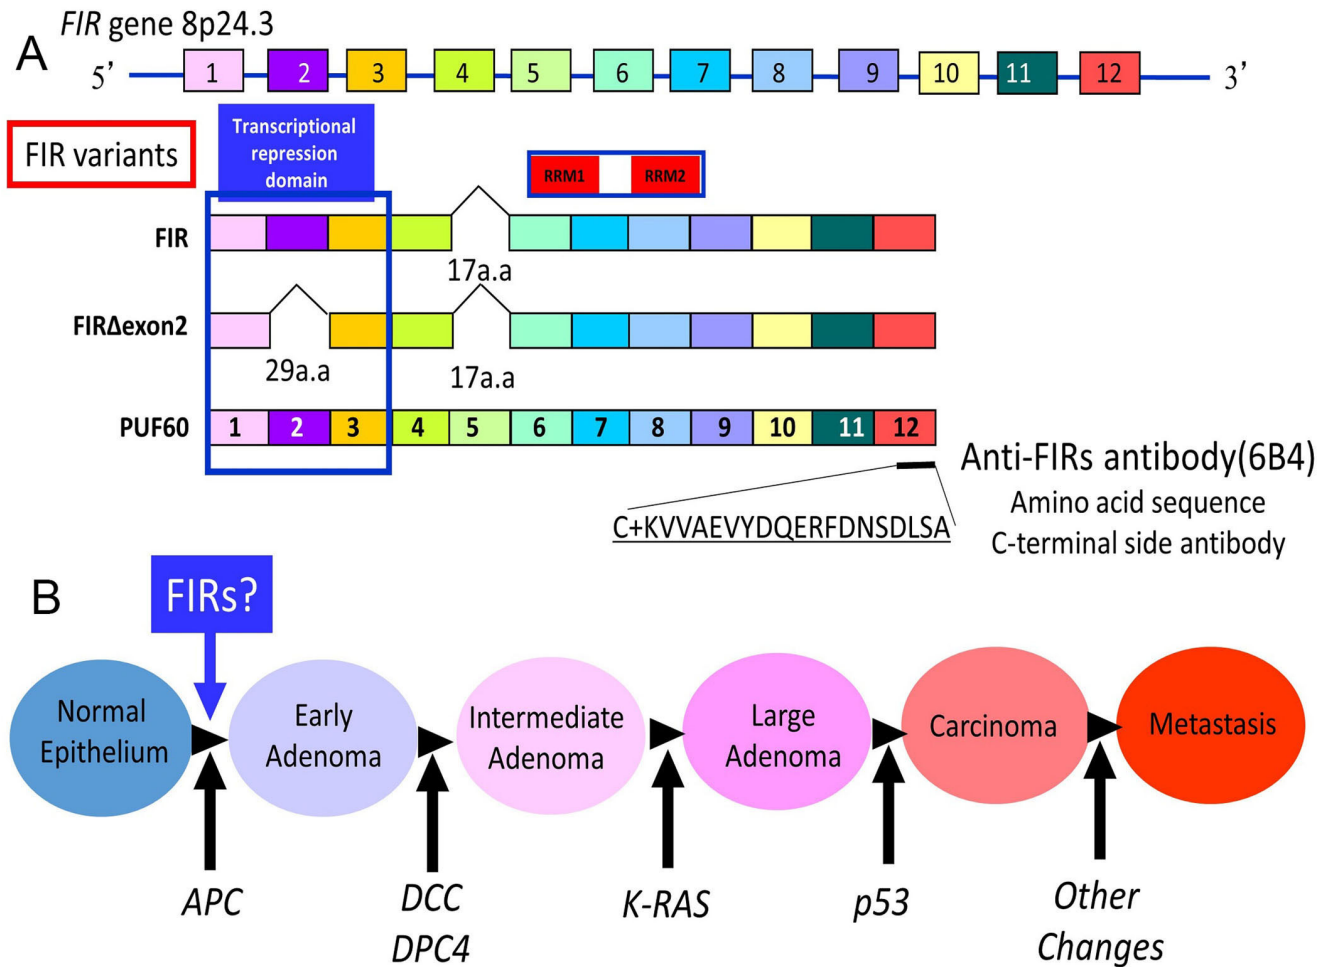

**Supplementary Figure S1:** (A) Schematic view of splice variants of the FIR gene. (B) The adenoma-carcinoma sequence. Progression of FIRs is accumulated in adenoma.

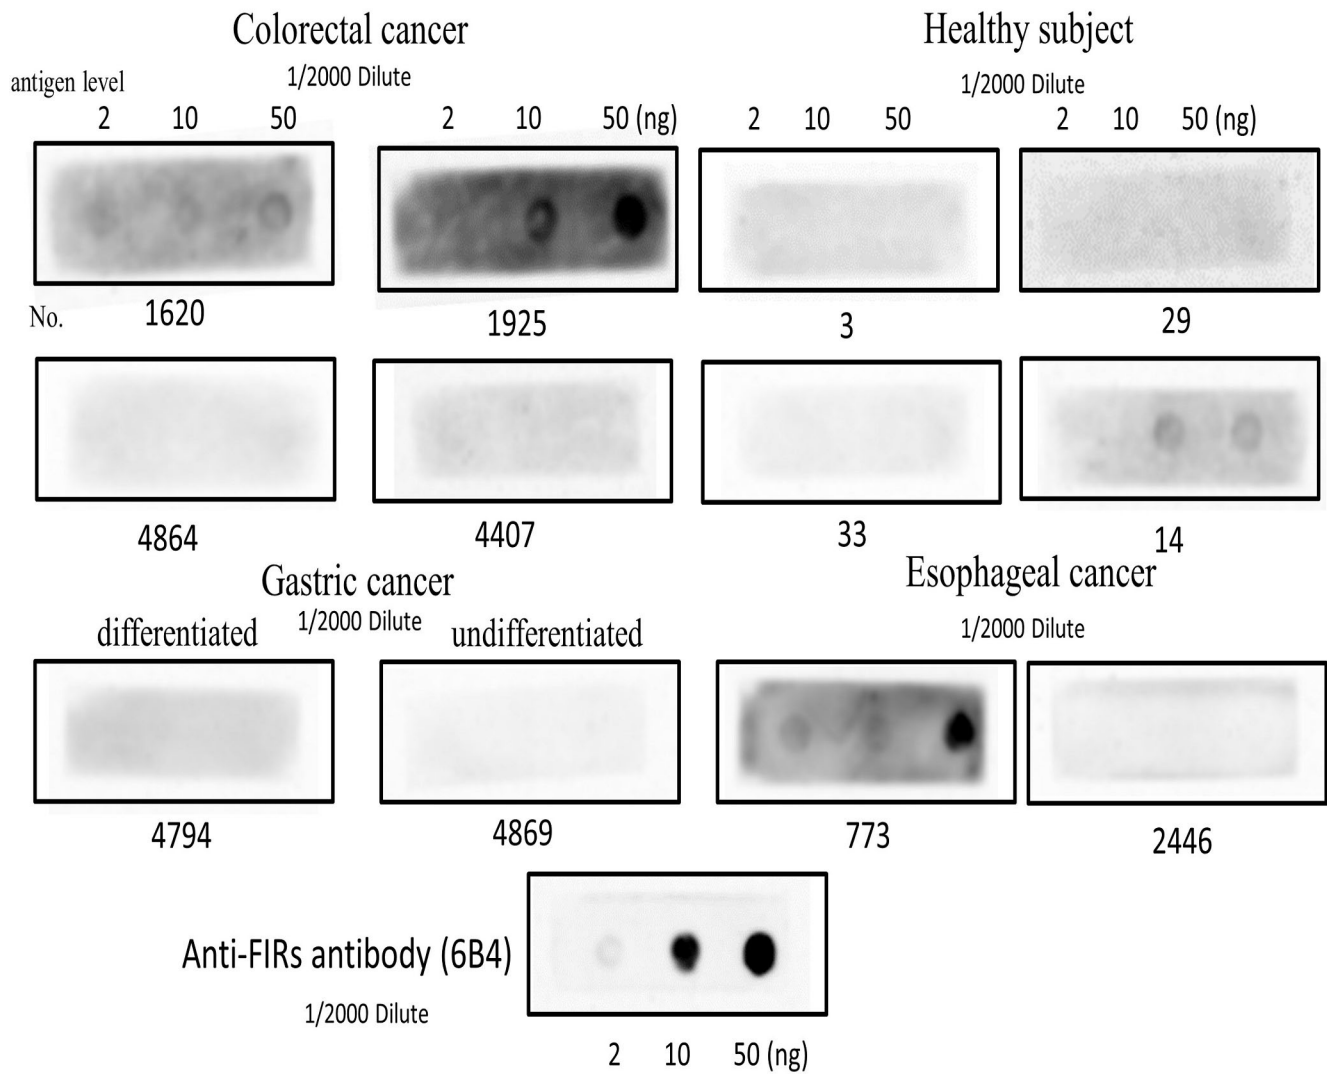

**Supplementary Figure S2: Purified FIR $\Delta$ exon2 protein was used as antigen to detect the possible presence of anti-FIR antibodies in the sera of colorectal cancer patients in a dose-dependent manner by dot blot assay.**

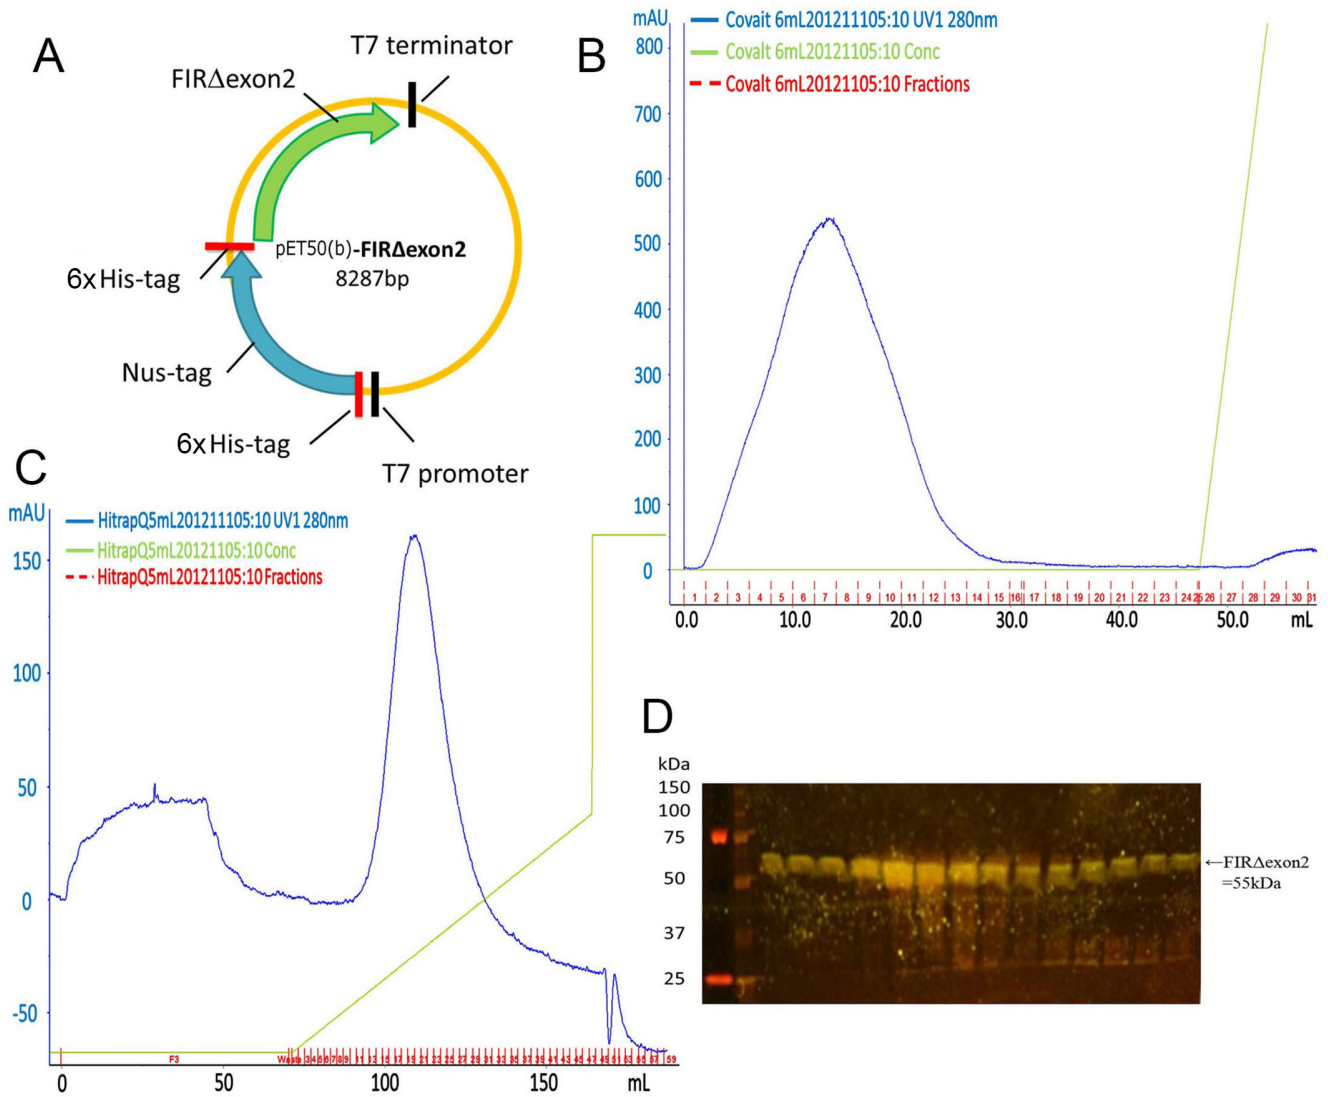

**Supplementary Figure S3:** (A) Expression vector pET50b (+) -FIRΔexon2. pET50b (+) -FIRΔexon2 expression vector was constructed by inserting the FIRΔexon2 gene into the pET-50b (+) DNA (Novagen) vector. (B) Co-affinity chromatography of purified FIRΔexon2 protein at the second phase. Imidazole concentrations are shown in green, and absorbance of 280 nm ultraviolet rays is shown in blue (0% = 10 mM, 100% = 500 mM). (C) The NaCl concentration of anion column chromatography of purified FIRΔexon2 protein is shown in green, and absorbance of 280 nm ultraviolet rays is shown in blue (0% = 50 mM, 100% = 1000 mM). (D) A 55.7-kDa band, which is the molecular weight of FIRΔexon2, was confirmed by gel electrophoresis after the His-Nus tag excision.

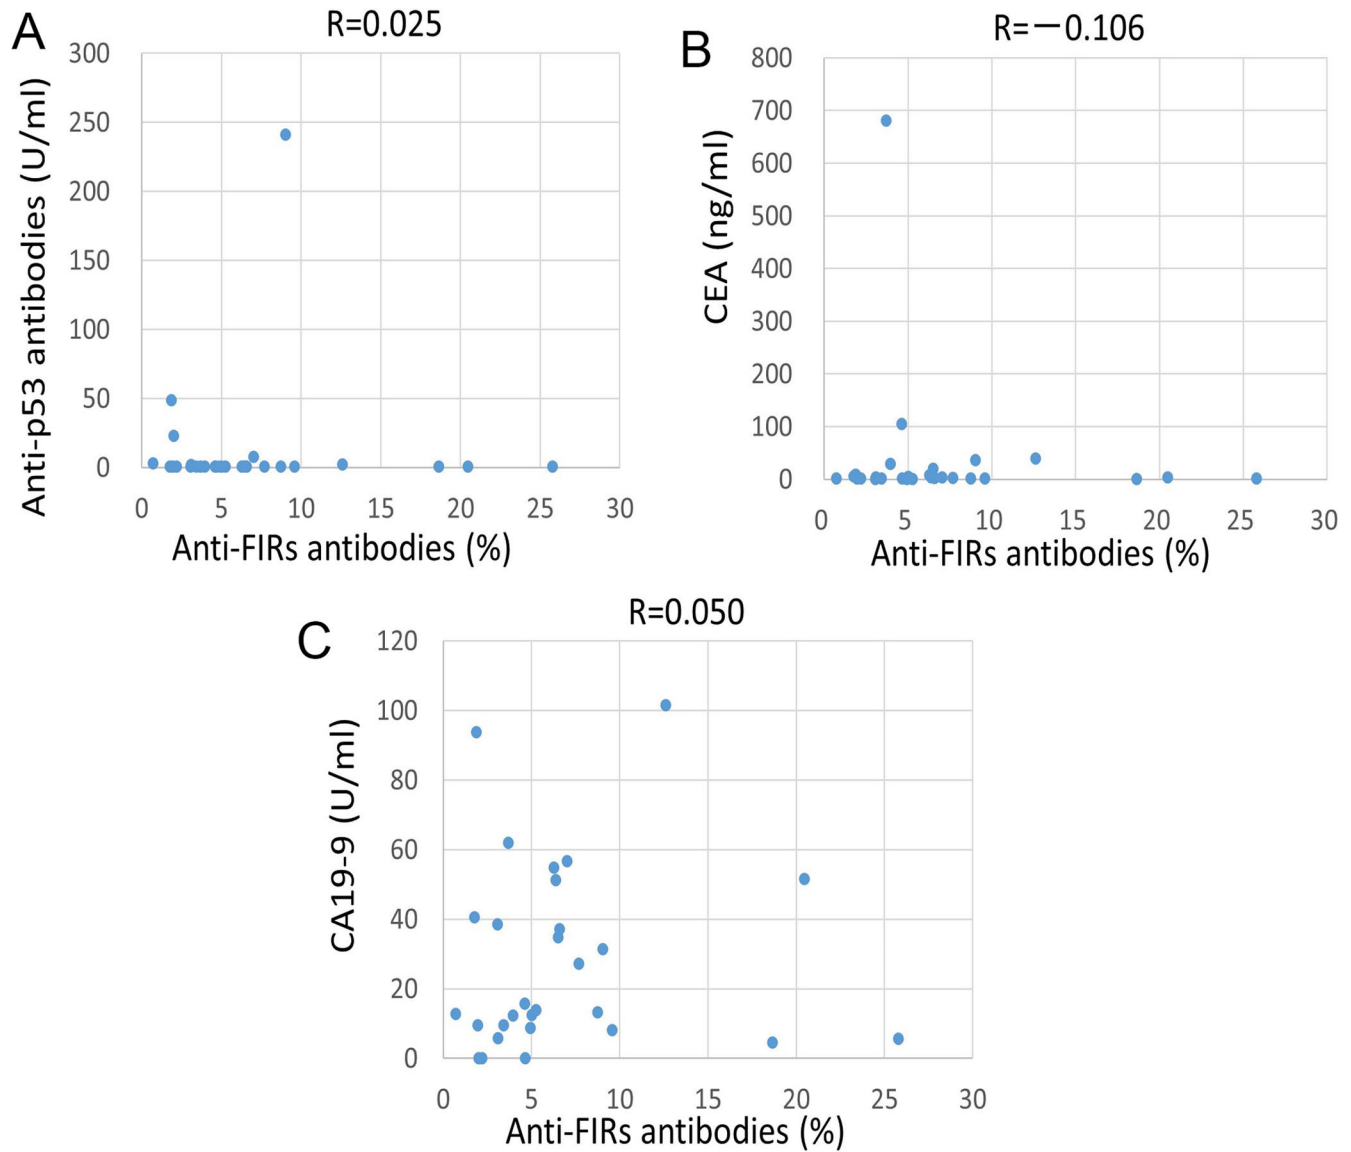

**Supplementary Figure S4: Correlation between anti-FIR antibodies and well-known other tumor markers.** Correlation between anti-FIR antibodies and three well-known tumor markers was analyzed by using statistical graphics. The level of anti-FIR antibodies detected in the sera of colorectal cancer patients was expressed as a percentage volume in the X-axis (horizontal axis). **(A)** The correlation between anti-FIR antibodies and anti-p53 antibodies. The level of anti-p53 antibodies measured in the sera of colorectal cancer patients was labeled in the Y-axis (vertical axis). **(B)** The correlation between anti-FIR antibodies and tumor marker CEA. The level of CEA measured in the sera of colorectal cancer patients was labeled in the Y-axis. **(C)** The correlation between anti-FIR antibodies and tumor marker CA19-9. The level of CA19-9 antibody measured in the sera of colorectal cancer patients was labeled in the Y-axis.

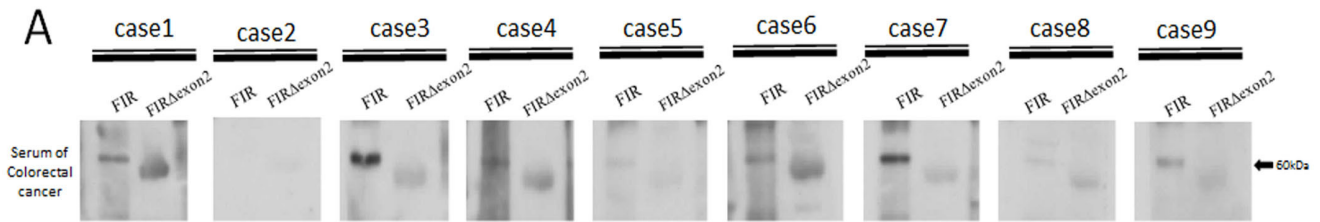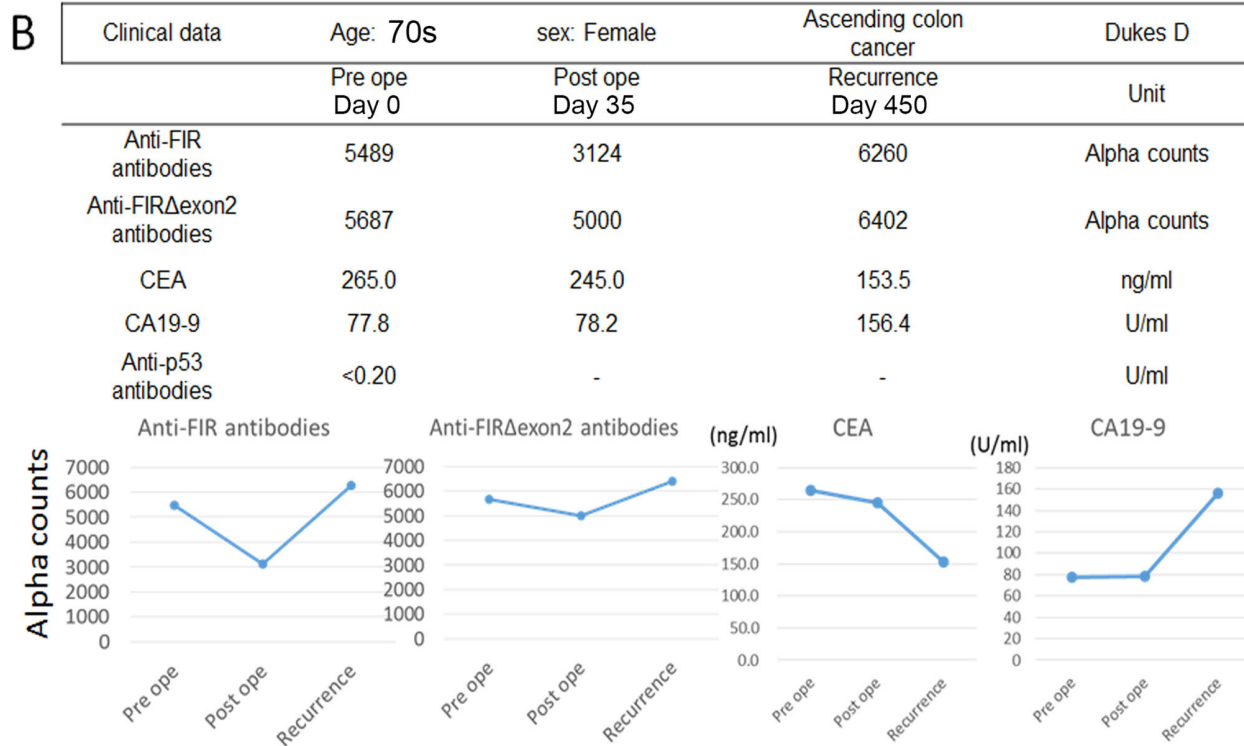

**Supplementary Figure S5:** (A) Anti-FIR or anti-FIR $\Delta$ exon2 antibodies against Nus-tag FIR or -FIR $\Delta$ exon2 as antigens were detected in nine relapsed cases of colon cancer patients after the operation. (B) The changes of anti-FIR or anti-FIR $\Delta$ exon2 antibodies, CEA, and CA19-9 in case 9 before and after operation with relapse of cancers.

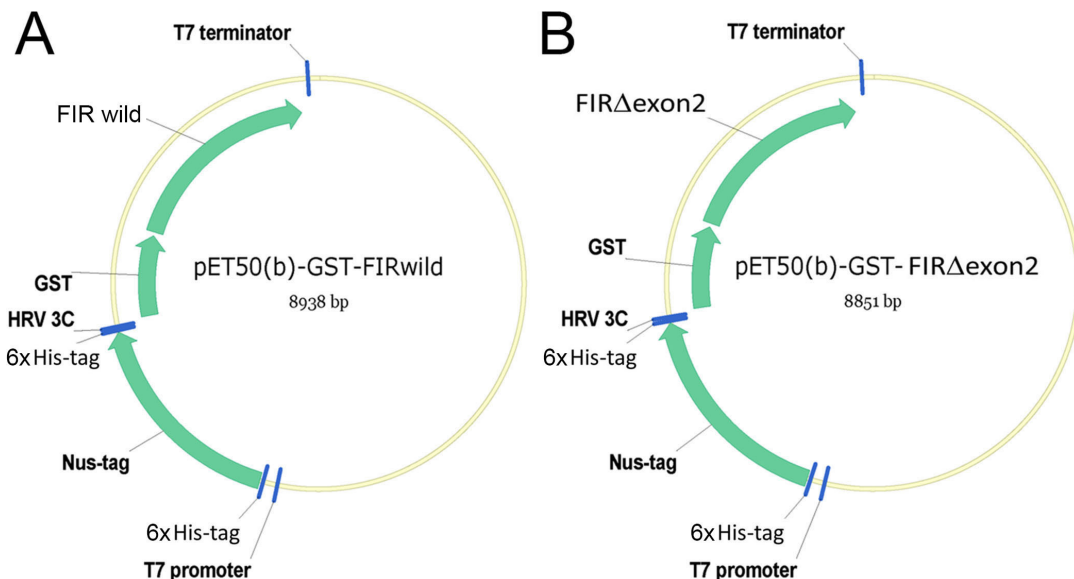

**Supplementary Figure S6:** Vector map for GST-fused FIR and FIR $\Delta$ exon2 in the pET-50(b) expression vector. Both of the GST-fused FIR (A) and FIR $\Delta$ exon2 (B) were expressed in the Nus-tag conjugated form and the Nus-tag was removed by the cleavage with HRV-3C enzyme in the purification process.

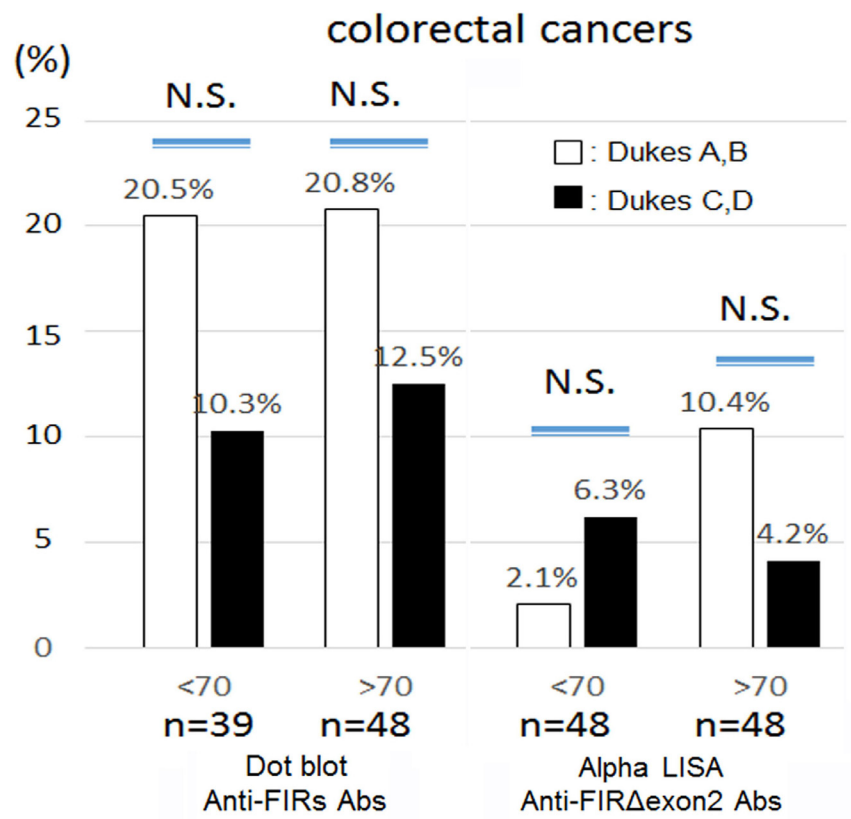

**Supplementary Figure S7:** Detection rate of anti-FIRs or anti-FIRΔexon2 antibodies in early-stage (Dukes A, B) and advanced (Dukes C, D) colorectal cancers patients in < 70 or 70 < year-old.

**Supplementary Table S1: Clinicopathological characteristics**

| <b>Colon polyps</b> | <b>Age</b> | <b>Sex</b> | <b>Grade</b> | <b>Site</b> | <b>Size (mm)</b> |
|---------------------|------------|------------|--------------|-------------|------------------|
|                     | 56         | M          | 3            | Rectum      | 40               |
|                     | 61         | M          | 3            | Ascending   | 7                |
|                     | 72         | F          | 5            | Rectum      | 20               |
|                     | 60         | M          | 3            | Rectum      | 10 × 15          |
|                     | 69         | M          | 3, 5         | Sigmoid     | 8, 10            |

  

| <b>Colorectal cancers</b> | <b>Age</b> | <b>Sex</b> | <b>Dukes stages</b> | <b>Sites</b> |
|---------------------------|------------|------------|---------------------|--------------|
|                           | 58         | F          | C                   | Cecum        |
|                           | 72         | M          | D                   | Sigmoid      |
|                           | 68         | M          | C                   | Sigmoid      |
|                           | 64         | F          | C                   | Decending    |
|                           | 43         | F          | C                   | Rectum       |
|                           | 58         | F          | C                   | Cecum        |
|                           | 49         | M          | B                   | Rectum       |
|                           | 39         | F          | C                   | Rectum       |
|                           | 48         | F          | C                   | Decending    |
|                           | 50         | M          | C                   | Rectum       |
|                           | 55         | M          | D                   | Rectum       |
|                           | 72         | M          | D                   | Sigmoid      |
|                           | 68         | M          | C                   | Sigmoid      |
|                           | 82         | M          | C                   | Ascending    |
|                           | 76         | F          | C                   | Ascending    |
|                           | 61         | M          | C                   | Rectum       |
